# Supplementary material for: Induction of Polyploidy and Metabolic Profiling in the Medicinal Herb Wedelia chinensis
Source: Plants (Basel). 2021 Jun 17;10(6):1232. doi: 10.3390/plants10061232 (PMC8235177; doi:10.3390/plants10061232)
Supplement: Supplementary file 1 [file plants-10-01232-s001.zip › plants-1249387-supplementary.pdf]

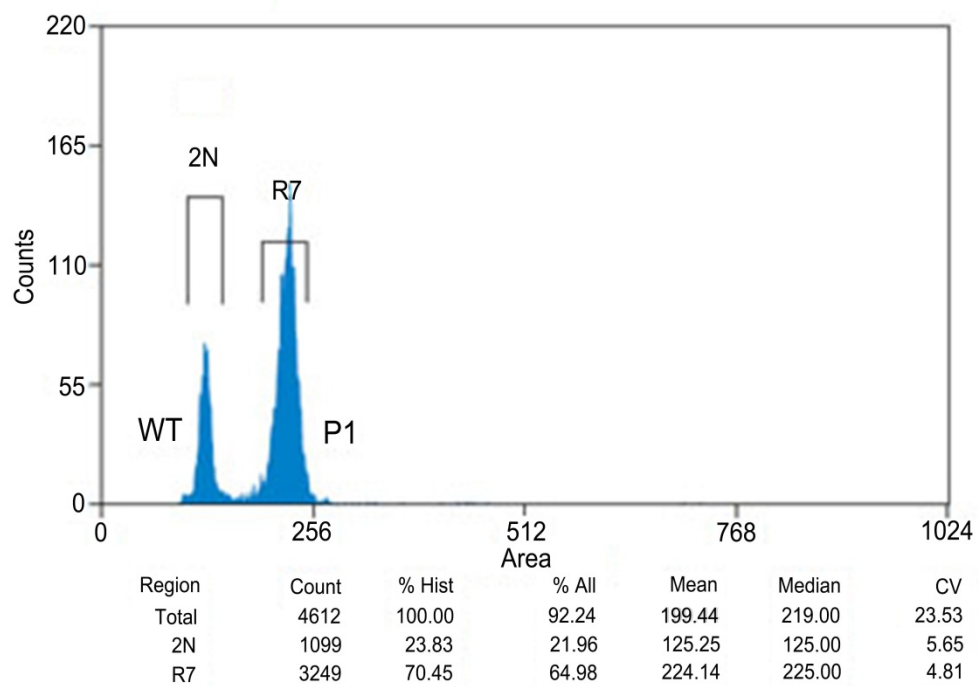

**Supplementary Figure S1.** Flow cytometry histogram of a mixture containing a wild-type diploid and a tetraploid P1 plants.

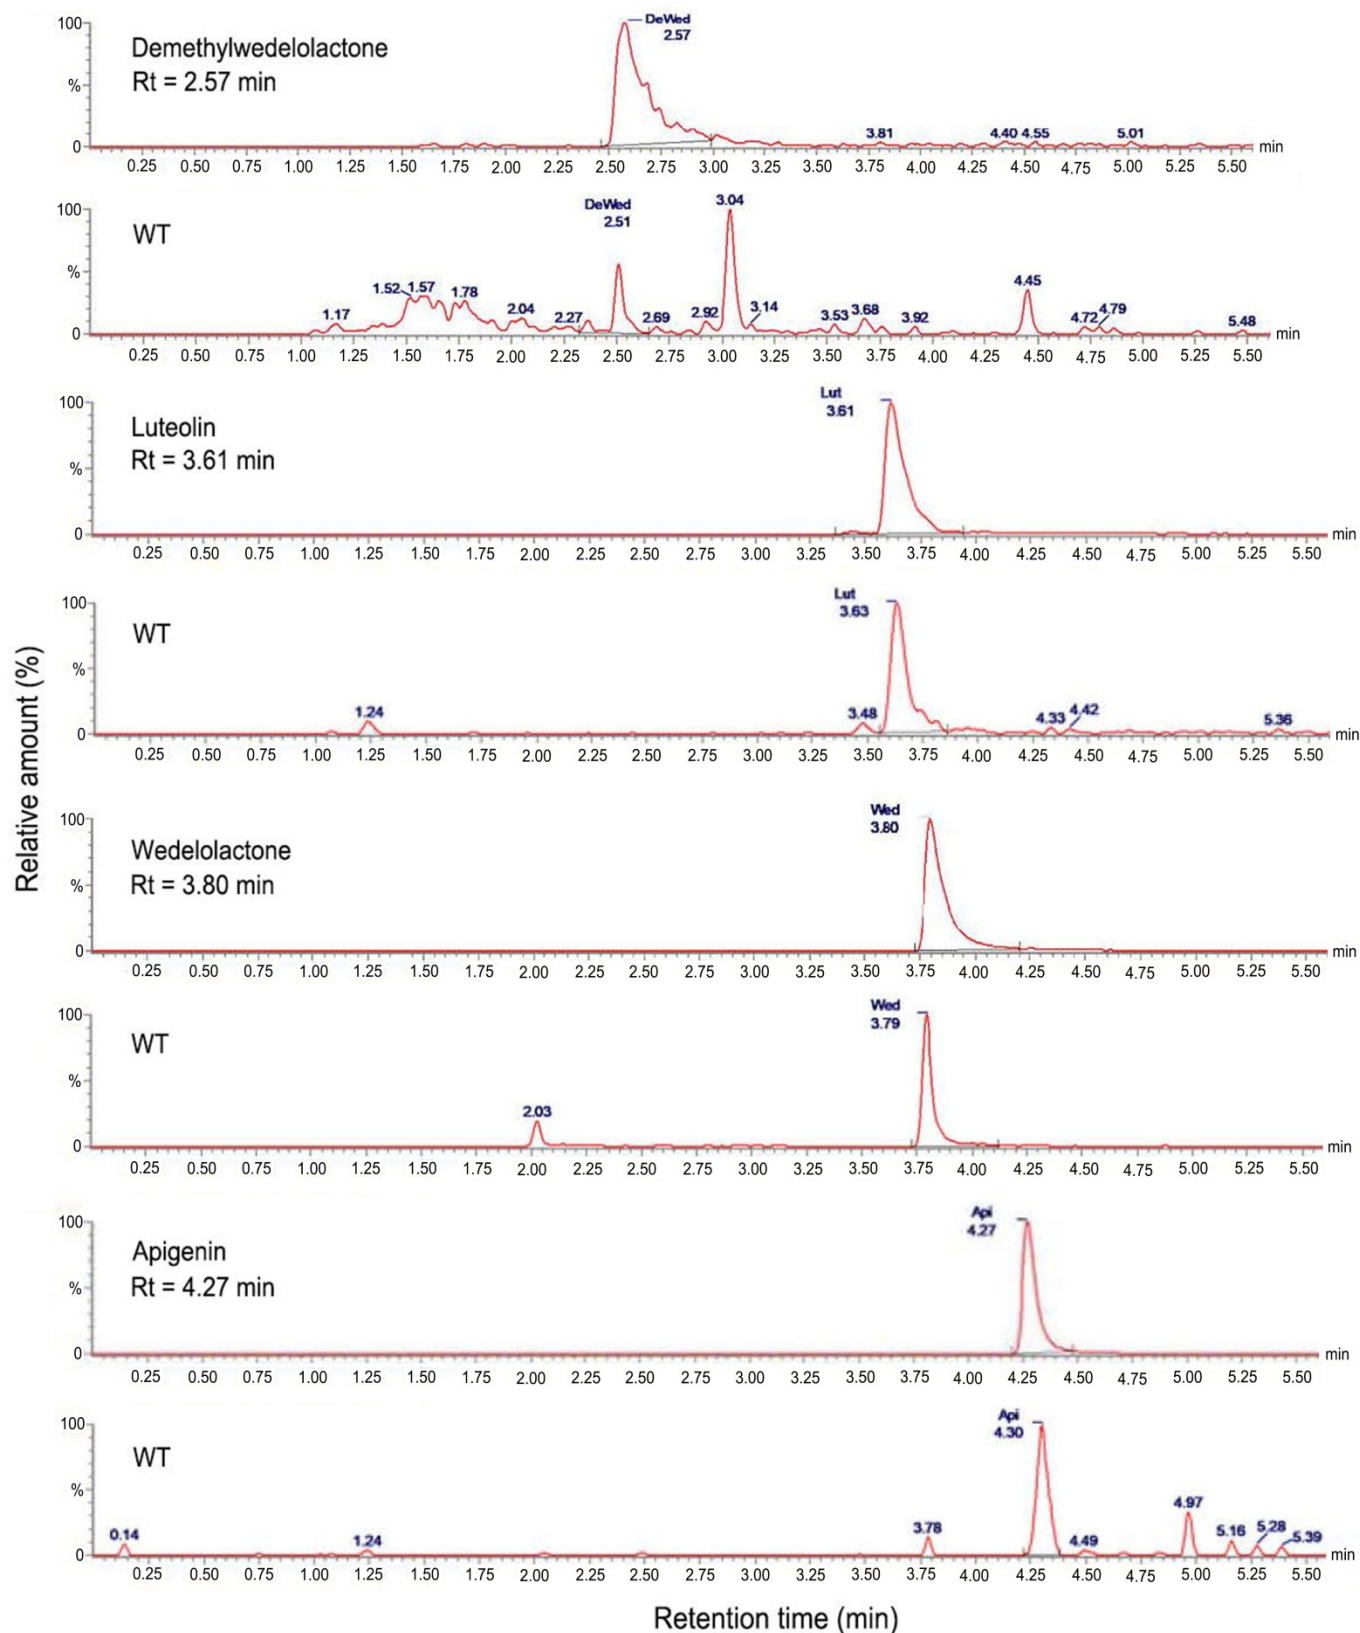

**Supplementary Figure S2.** Typical UPLC profiling of chemical standards (demethylwedelolactone, luteolin, wedelolactone, apigenin) and leaf extract from wild-type (WT) plants.
